# Supplementary material
Source: publisher site journal article supplement (https://www.dovepress.com/article/401027)
Supplement: Supplementary file 1 [file get_supplementary_file.php]

**Supplementary Table 1.** Outcomes of imaging features characterization for 298 patients enrolled based on consensus reading.

| **Feature** | **HCC**  **(N=225)** | **Non-HCC**  **(N=73)** | ***P*†** | ***κ* (95%CI)‡** |
| --- | --- | --- | --- | --- |
| T2WI signal intensity |  |  | <0.001 | 0.74 (0.62-0.86) |
| Iso- or hypointensity | 7 (3.1) | 11 (15.1) |  |  |
| Mild-moderate hyperintensity | 214 (95.1) | 57 (78.1) |  |  |
| Marked hyperintensity | 4 (1.8) | 5 (6.8) |  |  |
| Restricted diffusion |  |  | <0.001 | 0.76 (0.66-0.86) |
| Yes | 209 (92.9) | 25 (34.2) |  |  |
| No | 16 (7.1) | 48 (65.8) |  |  |
| Enhancement in arterial phase |  |  | <0.001 | 0.87 (0.81-0.94) |
| Nonrim APHE | 190 (84.4) | 46 (63.0) |  |  |
| Rim APHE | 6 (2.7) | 13 (17.8) |  |  |
| No APHE | 29 (12.9) | 14 (19.2) |  |  |
| Washout in PVP |  |  | <0.001 | 0.84 (0.78-0.90) |
| Non-peripheral washout | 157 (69.8) | 21 (28.8) |  |  |
| Peripheral washout | 4 (1.8) | 10 (13.7) |  |  |
| No washout | 64 (28.4) | 42 (57.5) |  |  |
| HBP signal intensity |  |  | 0.001 | 0.88 (0.74-1.00) |
| Hypointensity | 222 (98.7) | 65 (89.0) |  |  |
| Iso- or hyperintensity | 3 (1.3) | 8 (11.0) |  |  |
| Diagnostic hallmarks of HCC# |  |  | <0.001 | 0.85 (0.79-0.91) |
| Yes | 131 (58.2) | 8 (11.0) |  |  |
| No | 94 (41.8) | 65 (89.0) |  |  |

HCC = hepatocellular carcinoma, APHE = arterial phase hyperenhancement, PVP = portal venous phase, TP = transitional phase, HBP = hepatobiliary phase.

# Diagnostic hallmarks of HCC included T2WI mild-moderate hyperintensity, restricted diffusion, nonrim APHE, non-peripheral washout in PVP and HBP hypointensity.

† Data were analyzed by using Fisher’s exact test.

‡ Data in parentheses are 95% confidence intervals, and **κ** represents the interobserver variability.

**Supplementary Table 2.** Imaging features and definition.

| **Imaging features** | **Definition** |
| --- | --- |
| Mild-moderate hyperintensity on T2WI | Intensity on T2-weighted imaging mildly or moderately higher than liver and similar to or less than non-iron-overloaded spleen |
| Restricted diffusion | Intensity on diffusion-weighted imaging unequivocally higher than liver and/or ADC unequivocally lower than liver |
| Nonrim arterial hyperenhancement | Nonrim-like enhancement in arterial phase unequivocally greater in whole or in part than liver |
| Nonperipheral washout in portal venous phase | Nonperipheral visually assessed temporal reduction in enhancement in whole or in part relative to liver tissue in portal venous phase |
| Hepatobiliary phase hypointensity | Intensity in the hepatobiliary phase unequivocally less, in whole or in part, than liver |
